# Supplementary material for: IDD16 negatively regulates stomatal initiation via trans‐repression of SPCH in Arabidopsis
Source: PubMed Central journal article supplement (PMC6576023; doi:10.1111/pbi.13070), 2019-03-27
Supplement: PBI-17-1446-s001.pdf [file PBI-17-1446-s001.pdf]

## Supporting Information

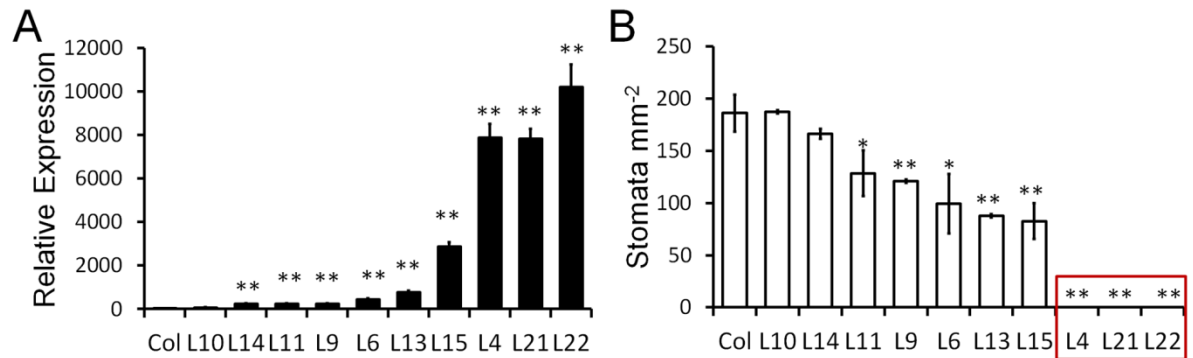

**Supplemental Figure 1. Correlation between stomatal density in cotyledons and *IDD16* transcripts level.**

(A) Expression level of *IDD16* in transgenic plants. qRT-PCR was performed on total RNA from 4-DAG wild-type and *IDD16*-OE plants. The expression level in wild-type was normalized as 1. (B) Stomatal density in cotyledons of 8-DAG *IDD16*-overexpression plants. Values are means  $\pm$  SE from three biological replicates. Asterisks indicate statistical significance based on Student's t test; \*\*  $P < 0.01$ , \*  $P < 0.05$ .

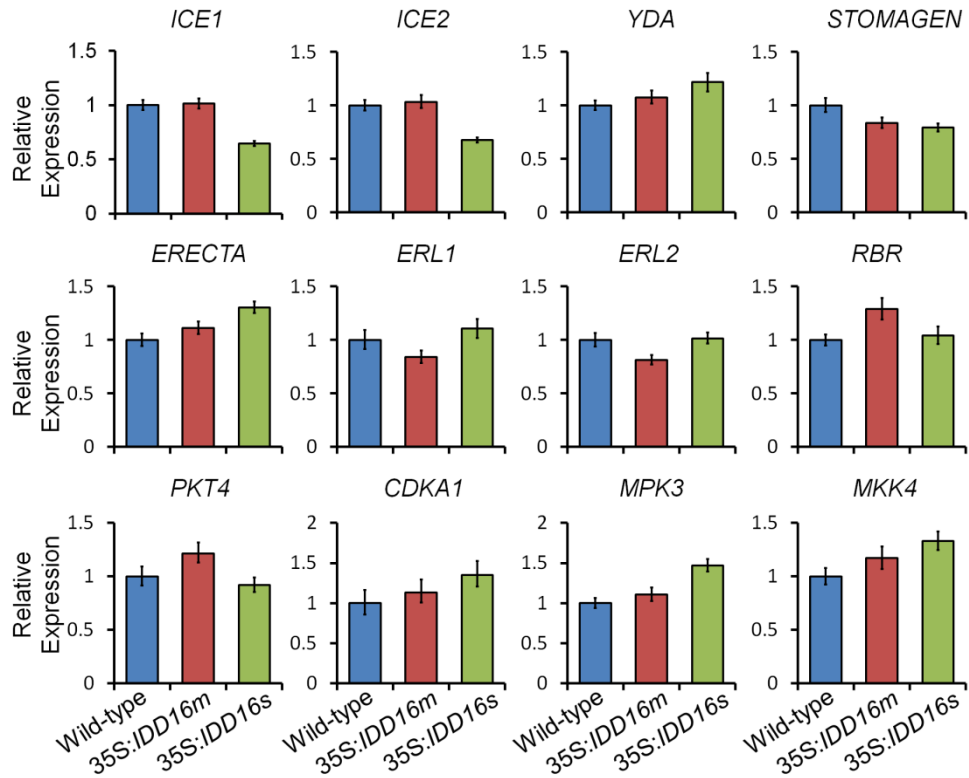

**Supplemental Figure 2 Analysis of the expression of the genes related to stomatal development.**

qRT-PCR was performed on total RNA from 4-DAG Wild-type and *IDD16*-OE plants. The expression level in wild-type was normalized as 1. Data represent means  $\pm$  SE of three biological replicates.

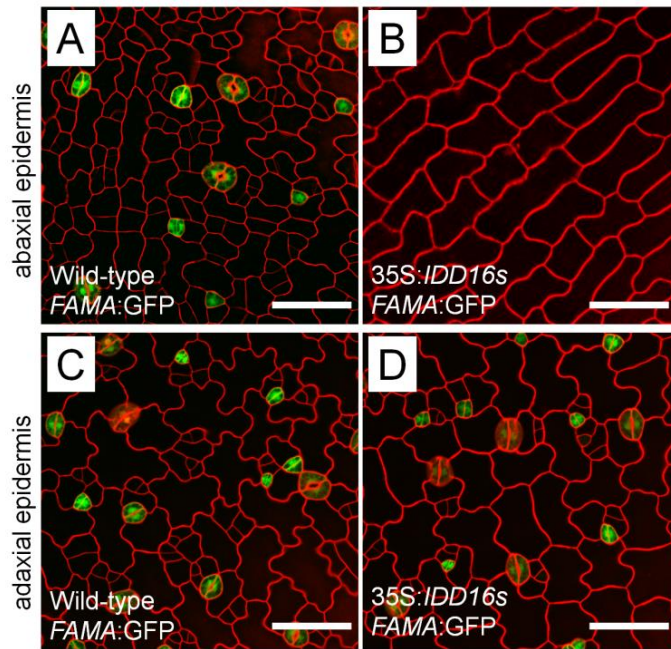

**Supplemental Figure 3 The effect of *IDD16* overexpression on *FAMA* expression.**

(A and B) Confocal images of *FAMA:GFP* abaxial cotyledons in 2-DAG wild-type and *35S:IDD16s* background, respectively. (C and D) show the images of *FAMA:GFP* on adaxial epidermis of cotyledons. Epidermal cell periphery is highlighted by propidium iodide (red) staining. Scale bars: 50  $\mu$ m.

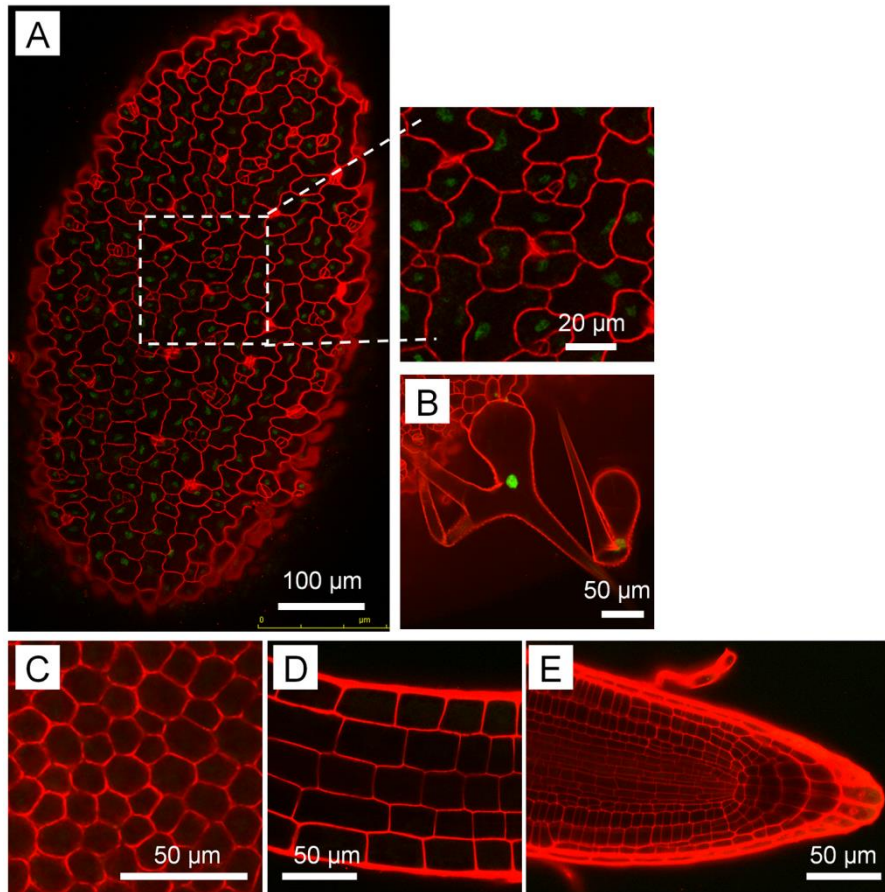

**Supplemental Figure 4 The expression pattern of *IDD16* protein.**

The expression of *IDD16* protein was visualized in *IDD16pro:IDD16-GFP* transgenic lines under confocal microscopy. (A) The expression pattern of *IDD16* protein in adaxial epidermis of 2-DAG seedling cotyledons, GFP signal was absent in meristemoid cells and young guard cells. (B-E) The expression is strong in trichome of young leaves of 7 DAG seedlings (B), but almost undetectable in mesophyll cells of cotyledons (C), root elongation zone (D) and root tip (E) of 1-DAG seedlings. Cell periphery is highlighted by propidium iodide (red) staining.

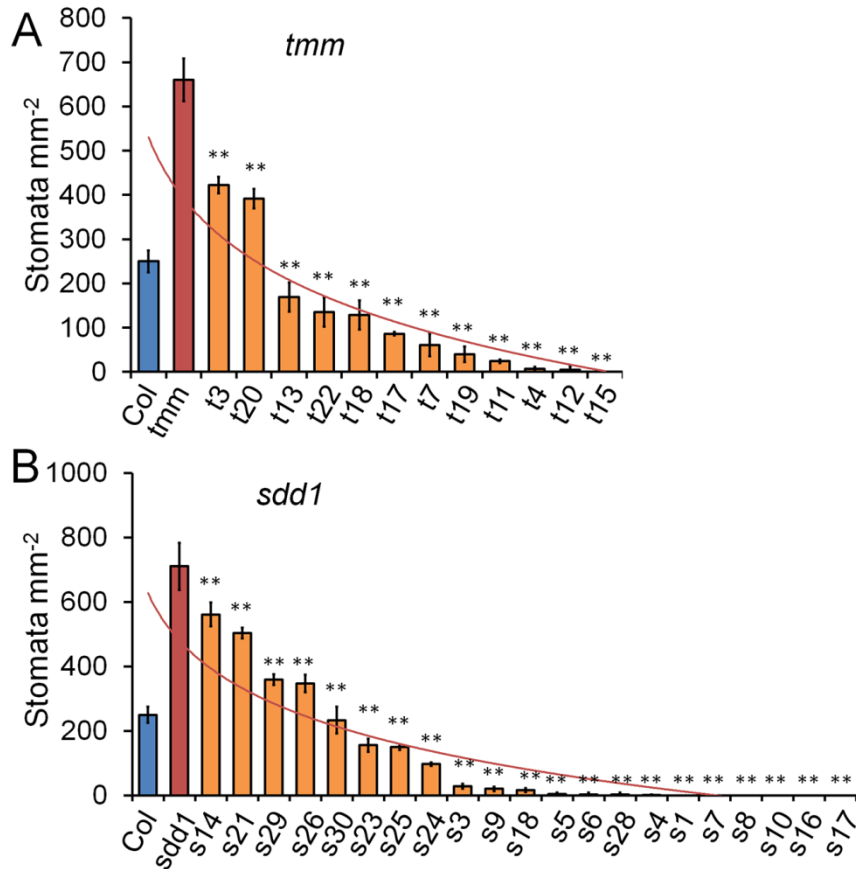

**Supplemental Figure 5 Effect of *IDD16* overexpression on stomatal density in different genetic backgrounds.**

Stomatal densities in abaxial epidermis of the cotyledons from 11-day-old *tmm* (A) and *sdd1* (B) seedlings containing *35Spro:IDD16* were analyzed. Values are means  $\pm$  SE from three biological replicates. Asterisks indicate statistical significance from the background (*tmm* or *sdd1*) based on Student's t test; \*\* P < 0.01.

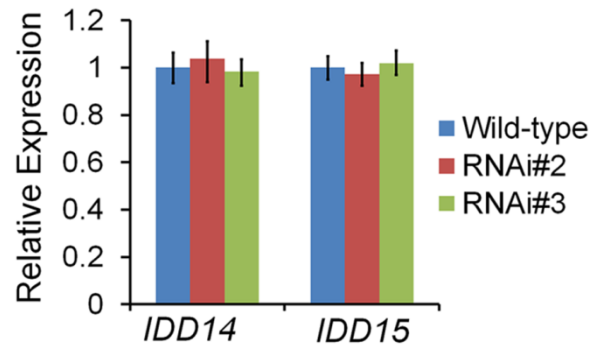

**Supplemental Figure 6** The expression of *IDD14* and *IDD15* were not affected in *IDD16*-RNAi lines.

The expression levels of *IDD14* and *IDD15* in 4-DAG wild-type and *IDD16*-RNAi seedlings were determined by qRT-PCR. Values are means  $\pm$  SE from three biological replicates. Primers are listed in Supplementary Table S1.

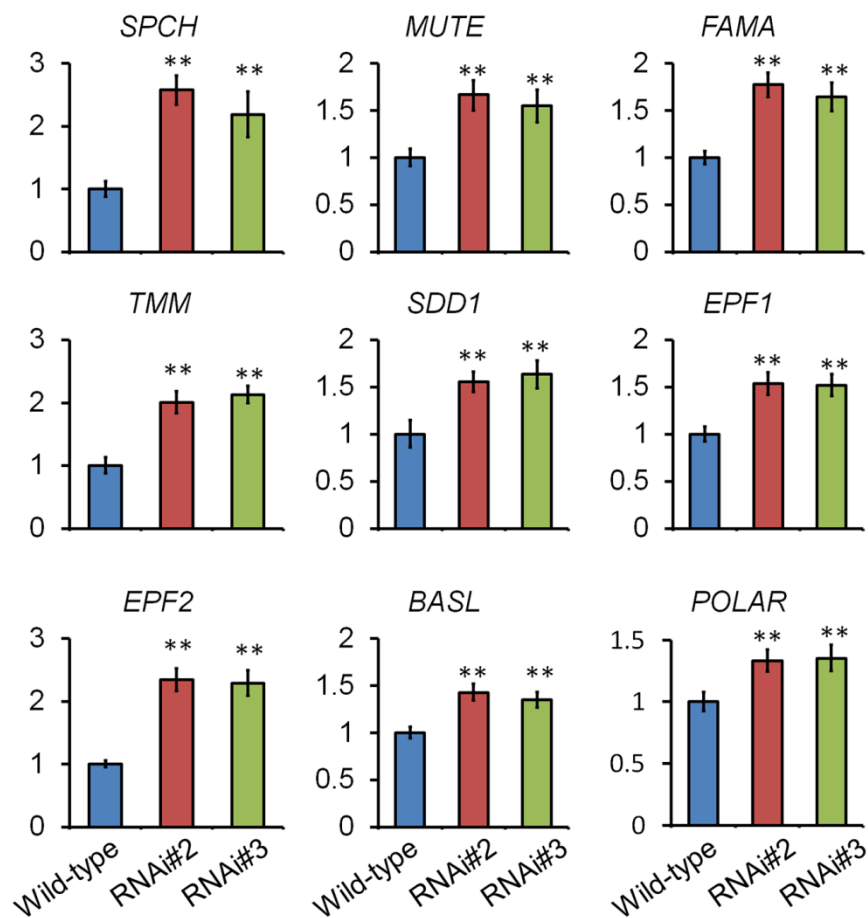

**Supplemental Figure 7** The expression of genes related to stomatal development was enhanced in *IDD16*-RNAi seedlings.

qRT-PCR was performed on total RNA from 4-DAG wild-type and *IDD16*-RNAi seedlings. Values are means  $\pm$  SE from three biological replicates. Asterisks indicate statistical significance based on Student's t test; \*\* P < 0.01.

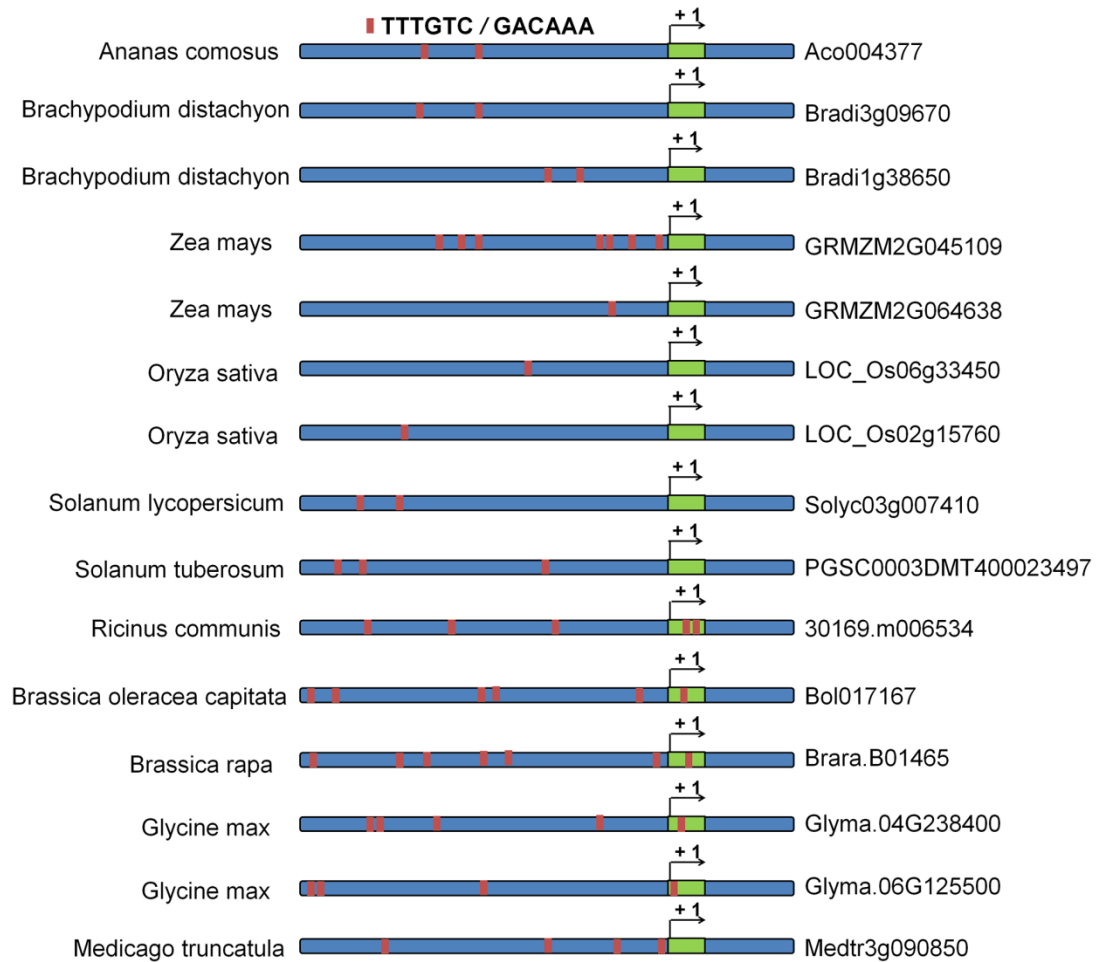

**Supplemental Figure 8 The core binding sites of IDD proteins in promoter of *SPCH*-like genes from angiosperms.**

The angiosperm genomes were searched through Phytozome v12 (<https://phytozome.jgi.doe.gov/pz/portal.html#>) by similarity search with the *SPCH* of *Arabidopsis*. 3-kb promoter region upstream of the initiation codon and the first exon were analyzed. Red bar represents the core binding sites (TTTGTC or GACAAA) of IDD proteins.

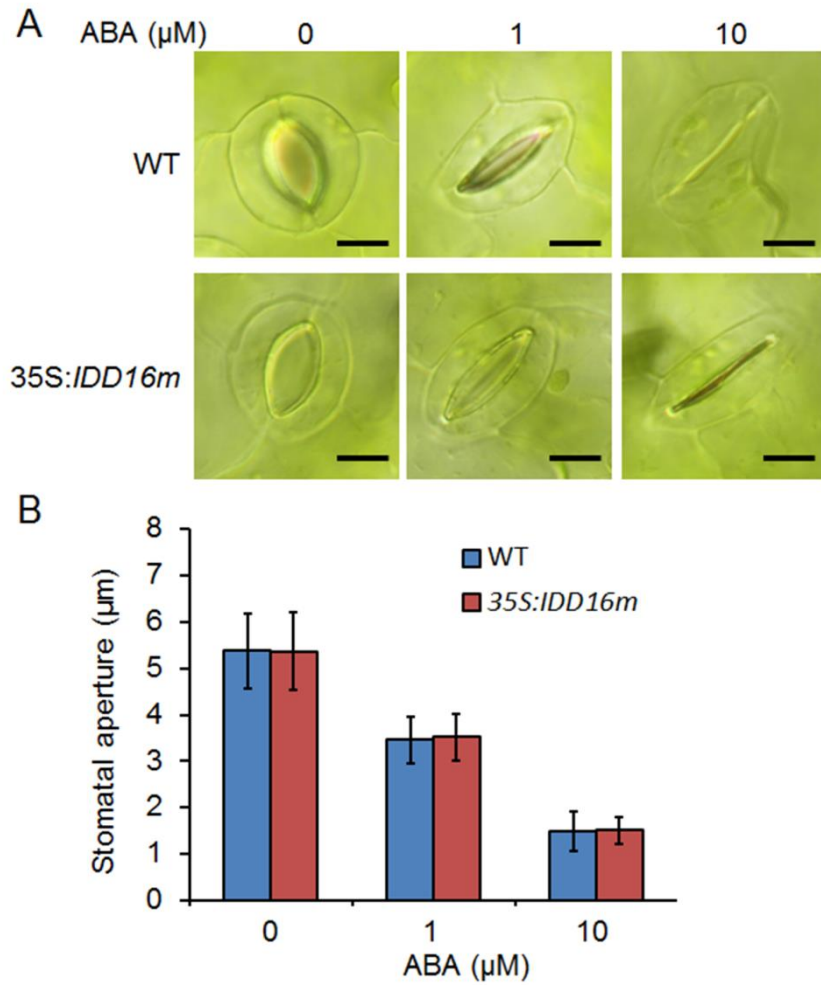

**Supplemental Figure 9** 35S:IDD16m plants exhibited similar stomatal aperture in response to ABA treatment compared with wild-type plants.

(A) Comparison of stomatal aperture in response to ABA treatment. (B) Stomatal aperture. Values are means  $\pm$  SE from three biological replicates, and each replication with 30 stomata from leaves of three different plants.

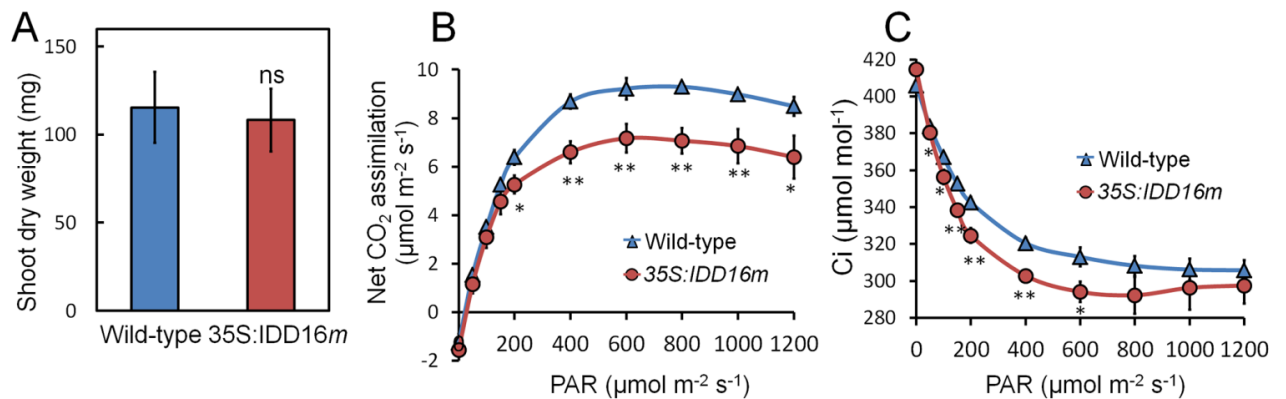



**Supplemental Figure 10 Growth and carbon assimilation of 35S:IDD16m plants were not affected under normal growth condition.**

(A) Shoot dry weight was measured at the completion of the WUE experiment. Values are means  $\pm$  SE from four biological replicates. The data are from three replicates, with each replicate include more than 20 plantlets. (B) Net CO<sub>2</sub> assimilation and (C) internal CO<sub>2</sub> concentration(Ci) were determined on individual leaves of 5-week-old wild-type (Col-0) and 35S:IDD16m plants using a Li-Cor 6400 gas exchange system, values are the Mean  $\pm$  SE (n = 4). Asterisks indicate statistical significance from the WT based on Student's t test; \*\* P < 0.01, \* P < 0.05.

**Table S1. Primers used in this study**

|                               | Primers             | Sequence                                                | Annotation                                  |
|-------------------------------|---------------------|---------------------------------------------------------|---------------------------------------------|
| Primers for transgenic plants |                     |                                                         |                                             |
|                               | <i>IDD16</i> -F     | CACCATGATACATTACGAACAAAACA                              | For the CDs of <i>IDD16</i> .               |
|                               | <i>IDD16</i> -R     | TCTCGCATTCTCCTTCAGT                                     |                                             |
|                               | <i>IDD16i</i> -F    | GGGGACAAGTTTGTACAAAAAAGCAGGC                            | DNA fragments for <i>IDD16</i> silencing.   |
|                               |                     | TCACCATCCGGCAACCTCA                                     |                                             |
|                               | <i>IDD16i</i> -R    | GGGGACCACTTTGTACAAGAAAGCTGGG<br>TATGGATAGTTGAAGTTCGAGGC |                                             |
|                               | <i>IDD16pro</i> -F  | AACTGCAGAAAGCAATAACCTAGATGAC                            | For the 2,621 bp promoter of <i>IDD16</i> . |
|                               | <i>IDD16pro</i> -R  | GACTAGTTGATGCCAAGAAGAAGATCG                             |                                             |
| Primers for qPCR              |                     |                                                         |                                             |
| AT3G13920                     | <i>eIF4a</i> -F     | TGACCACACAGTCTCTGCAA                                    |                                             |
|                               | <i>eIF4a</i> -R     | ACCAGGGAGACTTGTGGAC                                     |                                             |
| AT1G25250                     | <i>qIDD16</i> -F    | CAATGCTTCATCAGCTCCTTTC                                  |                                             |
|                               | <i>qIDD16</i> -R    | CGTTCGCTCTCTCCTTTGTTA                                   |                                             |
| AT5G53210                     | <i>qSPCH</i> -F     | ATCATAGGAGGAGTTGTGGAG                                   |                                             |
|                               | <i>qSPCH</i> -R     | TAGAACAGGCGGTGAAGGAC                                    |                                             |
| AT3G06120                     | <i>qMUTE</i> -F     | CGATCATCGGAGGAGTGATAGA                                  |                                             |
|                               | <i>qMUTE</i> -R     | AAGGGAAAGATGGTCGGTTTAG                                  |                                             |
| AT3G24140                     | <i>qFAMA</i> -F     | GAGCTCGAGCAACTCCTACAAT                                  |                                             |
|                               | <i>qFAMA</i> -R     | GAAGTCGTTGTCGTTGTCATGT                                  |                                             |
| AT1G80080                     | <i>qTMM</i> -F      | TCCTTCACCTAGAGGGCAATAA                                  |                                             |
|                               | <i>qTMM</i> -R      | ACGGTACTGGTCCTGTCAGACT                                  |                                             |
| AT1G04110                     | <i>qSDD1</i> -F     | AGCGGAATCACTGCTCTTATC                                   |                                             |
|                               | <i>qSDD1</i> -R     | GCTGGTTTGTACCATCCTTTATC                                 |                                             |
| AT2G20875                     | <i>qEPF1</i> -F     | ATGCCGTCTTGTGATGGTTAG                                   |                                             |
|                               | <i>qEPF1</i> -R     | TCAAGGGACAGGGTAGGACTT                                   |                                             |
| AT1G34245                     | <i>qEPF2</i> -F     | TTTGGTCGTTAACTCCATTCG                                   |                                             |
|                               | <i>qEPF2</i> -R     | ATCCGGTAAGCTTGATCCTGT                                   |                                             |
| At5g60880                     | <i>qBASL</i> -F     | TCCTCTAGACGGAGATGAAGATGG                                |                                             |
|                               | <i>qBASL</i> -R     | TGGTGGGCTTAGGCTGAGTTTC                                  |                                             |
| At4g31805                     | <i>qPOLAR</i> -F    | TGAGTCACAAAGCAGAGAGTCACC                                |                                             |
|                               | <i>qPOLAR</i> -R    | TCCATTTGCATTTCGCAGGTTTGTC                               |                                             |
| AT3G26744                     | <i>qICE1</i> -F     | TCTTTGCCTCCAACCTTCATC                                   |                                             |
|                               | <i>qICE1</i> -R     | CACTGCTCTTCCTTCCCTTA                                    |                                             |
| AT1G12860                     | <i>qICE2</i> -F     | GTGTCCATCTTCCTCCTTGC                                    |                                             |
|                               | <i>qICE2</i> -R     | ACAGCTAATCACCGCTTGTT                                    |                                             |
| AT1G63700                     | <i>qYDA</i> -F      | CACCATGAGATCACTGGACATT                                  |                                             |
|                               | <i>qYDA</i> -R      | GCCATGTTTTAATCCTTTCTGC                                  |                                             |
| AT4G12970                     | <i>qSTOMAGEN</i> -F | TGTAGTTCAAGCCTCAAGAC                                    |                                             |
|                               | <i>qSTOMAGEN</i> -R | TTGATAGGGTCATTTCCCTTC                                   |                                             |

**Table S1. Cont.**

|                       | Primers                                  | Sequence                                                     | Annotation                                                                                |
|-----------------------|------------------------------------------|--------------------------------------------------------------|-------------------------------------------------------------------------------------------|
| AT2G26330             | q <i>ERECTA</i> -F<br>q <i>ERECTA</i> -R | GATAATGTCAAAGACGGGGAAC<br>GGAAAACTTTCTTCACCACACC             |                                                                                           |
| At5g62230             | q <i>ERL1</i> -F<br>q <i>ERL1</i> -R     | CGCATAACTTGCGGGAATTTG<br>AGTCCTTGTGCAGCTCCAACC               |                                                                                           |
| AT5G07180             | q <i>ERL2</i> -F<br>q <i>ERL2</i> -R     | GCTGTGGATAACGAGGCCAAC<br>CATGGTGGGTCTCTCCAAAGG               |                                                                                           |
| AT3G12280             | q <i>RBR</i> -F<br>q <i>RBR</i> -R       | CAGATGGCTTGACCTACTTTGA<br>CCTCTCATCAAGTTCGCCTTTA             |                                                                                           |
| AT1G04710             | q <i>PKT4</i> -F<br>q <i>PKT4</i> -R     | ACGAGTTGCTTGCCCTCTGTA<br>CACTGTCTGTTACGGTTCCTG               |                                                                                           |
| AT3G48750             | q <i>CDKA1</i> -F<br>q <i>CDKA1</i> -R   | GCCAAAAGCCCTTATTTCCCT<br>GTTACCCACGCCATGTATC                 |                                                                                           |
| AT3G45640             | q <i>MPK3</i> -F<br>q <i>MPK3</i> -R     | TGACGTTTGACCCCAACAGA<br>CTGTTCCATCCAGAGGCTG                  |                                                                                           |
| AT1G51660             | q <i>MKK4</i> -F<br>q <i>MKK4</i> -R     | TCTTCCTCTCCCACCTACTTC<br>TGGAGCTGTTAGTGTTCGTTG               |                                                                                           |
| AT1G68130             | q <i>IDD14</i> -F<br>q <i>IDD14</i> -R   | GGGACACCGGATCCGG<br>GTCTTGGTGCTCTATGAACTTTCC                 |                                                                                           |
| AT2G01940             | q <i>IDD15</i> -F<br>q <i>IDD15</i> -R   | CCACAAACACATCCACTCAGA<br>TCTGGTCTCTTTGAAACCCTTG              |                                                                                           |
| Primers for ChIP-qPCR |                                          |                                                              |                                                                                           |
|                       | P1-F                                     | ACTATGTCCGCTAAATCA                                           | Used for detect the enrichment of regions 1, 2, 3, 4 of the <i>SPCH</i> gene.             |
|                       | P1-R                                     | ATGAAACATCAGCAATTAGA                                         |                                                                                           |
|                       | P2-F                                     | TAATTTGGGCTAGAAACAAAGC                                       |                                                                                           |
|                       | P2-R                                     | AGAAGATGGAGCCAAGAC                                           |                                                                                           |
|                       | P3-F                                     | ATGCAGGAGATAATACCG                                           |                                                                                           |
|                       | P4-F                                     | ATCATAGGAGGAGTTGTGGAG                                        |                                                                                           |
|                       | P4-R                                     | TAGAACAGGCGGTGAAGGAC                                         |                                                                                           |
| At3g18780             | ACTIN2-F<br>ACTIN2-R                     | CGTTTCGCTTTCCTTAGTGTTAGCT<br>AGCGAACGGATCTAGAGACTCACC<br>TTG |                                                                                           |
| AT3G30720             | QQS-F<br>QQS-R                           | TCTGCAATTATGTAAACATA<br>ACAAATCAAAGGCCAATATC                 | Used for detect the enrichment of the fragment of <i>QQS</i> gene, as a positive control. |
